# Supplementary material for: Preferred versus Actual Place of Care and Factors Associated with Home Discharge among Korean Patients with Advanced Cancer: A Retrospective Cohort Study
Source: MDPI journal article supplement (doi:10.3390/healthcare11131939), 2023-07-05
Supplement: s1 [file s1]

**Supplementary Table S1. Characteristics of patients who preferred home as place of care by the actual discharge place**

| Variables                 | Total<br>(N=210) |      | Discharged home<br>(N=113) |      | Discharged to<br>hospital<br>(N=48) |      | Death<br>(N=49) |      | <i>P</i> value    |
|---------------------------|------------------|------|----------------------------|------|-------------------------------------|------|-----------------|------|-------------------|
|                           | N                | %    | N                          | %    | N                                   | %    | N               | %    |                   |
| Age                       |                  |      |                            |      |                                     |      |                 |      | 0.07              |
| median (IQR)              | 64 (56.2-73)     |      | 64 (53-73)                 |      | 63 (54-73)                          |      | 69 (63-74)      |      | 0.06 <sup>a</sup> |
| <45                       | 20               | 9.5  | 13                         | 11.5 | 7                                   | 14.6 | 0               | 0    |                   |
| ≥45, <65                  | 87               | 41.4 | 49                         | 43.4 | 18                                  | 37.5 | 20              | 40.8 |                   |
| ≥65                       | 103              | 49   | 51                         | 45.1 | 23                                  | 47.9 | 29              | 59.2 |                   |
| Gender                    |                  |      |                            |      |                                     |      |                 |      | 0.04              |
| Male                      | 122              | 58.1 | 58                         | 51.3 | 29                                  | 60.4 | 35              | 71.4 |                   |
| Female                    | 88               | 41.9 | 55                         | 55   | 19                                  | 39.6 | 14              | 28.6 |                   |
| Residence                 |                  |      |                            |      |                                     |      |                 |      | 0.85 <sup>b</sup> |
| Metropolitan              | 175              | 83.3 | 94                         | 94   | 38                                  | 79.2 | 43              | 87.8 |                   |
| Urban                     | 19               | 9.0  | 10                         | 10   | 6                                   | 12.5 | 3               | 6.1  |                   |
| Suburban/rural            | 16               | 7.0  | 9                          | 9    | 4                                   | 8.3  | 3               | 6.1  |                   |
| Medical insurance         |                  |      |                            |      |                                     |      |                 |      | 0.48 <sup>b</sup> |
| National health insurance | 201              | 95.7 | 106                        | 93.8 | 47                                  | 97.9 | 48              | 97.9 |                   |
| Medical aid               | 6                | 2.9  | 5                          | 4.4  | 1                                   | 2.1  | 0               | 0    |                   |
| Other                     | 3                | 1.4  | 2                          | 1.8  | 0                                   | 0    | 1               | 2.1  |                   |
| Marital status            |                  |      |                            |      |                                     |      |                 |      | 0.32 <sup>b</sup> |
| Married                   | 162              | 77.5 | 86                         | 76.1 | 34                                  | 70.8 | 42              | 87.5 |                   |
| Divorced                  | 10               | 4.8  | 5                          | 4.4  | 3                                   | 6.2  | 2               | 4.2  |                   |
| Bereaved                  | 17               | 8.1  | 8                          | 7.1  | 5                                   | 10.4 | 4               | 8.3  |                   |
| Single                    | 16               | 7.7  | 10                         | 8.8  | 6                                   | 12.5 | 0               | 0    |                   |
| Unknown                   | 4                | 1.9  | 4                          | 3.5  | 0                                   | 0    | 0               | 0.   |                   |
| Religion                  |                  |      |                            |      |                                     |      |                 |      | 0.11              |

|                                 |     |      |    |      |    |      |    |      |                   |
|---------------------------------|-----|------|----|------|----|------|----|------|-------------------|
| Christian                       | 52  | 24.9 | 29 | 25.7 | 17 | 35.4 | 6  | 12.2 |                   |
| Catholic                        | 28  | 13.4 | 16 | 14.2 | 2  | 4.2  | 10 | 20.8 |                   |
| Buddhism                        | 35  | 16.7 | 20 | 17.7 | 9  | 18.8 | 6  | 12.5 |                   |
| Other                           | 3   | 1.4  | 2  | 1.8  | 0  | 0    | 1  | 2.1  |                   |
| None                            | 78  | 37.3 | 38 | 33.6 | 19 | 39.6 | 21 | 43.8 |                   |
| Unknown                         | 13  | 6.2  | 8  | 7.1  | 1  | 2.1  | 4  | 8.3  |                   |
| Caregiving                      |     |      |    |      |    |      |    |      |                   |
| No. of families living together |     |      |    |      |    |      |    |      | 0.12              |
| 0                               | 4   | 1.9  | 0  | 0    | 3  | 6.2  | 1  | 2.1  |                   |
| 1                               | 94  | 44.7 | 49 | 43.4 | 26 | 54.2 | 19 | 39.6 |                   |
| 2 or more                       | 92  | 43.8 | 50 | 44.2 | 17 | 35.5 | 25 | 52.1 |                   |
| Unknown                         | 19  | 9.0  | 14 | 12.4 | 2  | 4.2  | 3  | 6.2  |                   |
| Relationship of main caregiver  |     |      |    |      |    |      |    |      | 0.20              |
| Spouse                          | 129 | 62   | 76 | 66.4 | 24 | 51.5 | 30 | 62.5 |                   |
| Son/daughter                    | 28  | 13.5 | 17 | 15.0 | 5  | 10.6 | 6  | 12.5 |                   |
| Parents                         | 41  | 19.7 | 17 | 15.0 | 14 | 29.8 | 10 | 20.8 |                   |
| ≥2nd degree relatives           | 6   | 2.9  | 2  | 1.8  | 3  | 6.4  | 1  |      |                   |
| Other                           | 1   | 0.5  | 1  | 0.9  | 1  | 2.1  | 0  | 0    |                   |
| Unknown                         | 3   | 1.4  | 1  | 0.9  | 1  | 2.1  | 1  | 2.1  |                   |
| Type of cancer <sup>c</sup>     |     |      |    |      |    |      |    |      | 0.50 <sup>b</sup> |
| Lung                            | 42  | 20   | 23 | 20.4 | 7  | 14.6 | 12 | 24.5 |                   |
| Breast                          | 11  | 5.2  | 7  | 6.2  | 3  | 6.2  | 1  | 2.0  |                   |
| Gastrointestinal                | 36  | 17.1 | 20 | 17.7 | 9  | 18.8 | 7  | 14.3 |                   |
| Hepatobiliary-pancreas          | 53  | 25.2 | 24 | 21.2 | 11 | 22.9 | 18 | 36.7 |                   |
| Hematologic malignancy          | 16  | 7.6  | 11 | 9.7  | 3  | 6.2  | 2  | 4.1  |                   |
| Other                           | 52  | 24.8 | 28 | 24.8 | 15 | 31.2 | 9  | 18.4 |                   |
| Treatment status                |     |      |    |      |    |      |    |      | <0.001            |
| On chemotherapy                 | 77  | 37   | 55 | 48.7 | 16 | 34.0 | 6  | 12.5 |                   |
| Off chemotherapy                | 131 | 63   | 58 | 51.3 | 31 | 66.0 | 42 | 87.5 |                   |

|                          |           |      |            |      |                 |      |            |      |                   |
|--------------------------|-----------|------|------------|------|-----------------|------|------------|------|-------------------|
| Route of admission       |           |      |            |      |                 |      |            |      | 0.06              |
| via outpatient clinic    | 82        | 39   | 52         | 46.0 | 13              | 27.1 | 17         | 34.7 |                   |
| via emergency department | 128       | 61   | 61         | 54.0 | 35              | 72.9 | 32         | 65.3 |                   |
| Duration of admission    |           |      |            |      |                 |      |            |      |                   |
| median (IQR)             | 15 (9-28) |      | 9 (6-14.5) |      | 18.5 (3.2-30.8) |      | 23 (13-38) |      | 0.04 <sup>a</sup> |
| Major medical problem    |           |      |            |      |                 |      |            |      |                   |
| Confusion                | 18        | 8.7  | 7          | 6.2  | 5               | 10.4 | 6          | 12.8 | 0.24 <sup>b</sup> |
| Pain                     | 153       | 73.6 | 8          | 71.4 | 35              | 72.9 | 38         | 79.2 | 0.64              |
| Fever                    | 35        | 16.8 | 16         | 14.2 | 12              | 25.0 | 7          | 14.9 | 0.28 <sup>b</sup> |
| Dyspnea                  | 74        | 35.4 | 3          | 27.4 | 15              | 31.2 | 28         | 58.3 | 0.01              |
| Nausea/vomiting          | 36        | 17.2 | 18         | 15.9 | 10              | 20.8 | 8          | 16.7 | 0.75 <sup>b</sup> |
| Poor oral intake         | 111       | 53.1 | 47         | 41.6 | 27              | 56.2 | 37         | 77.1 | <0.001            |
| Urologic symptoms        | 10        | 4.8  | 6          | 5.4  | 0               | 0    | 4          | 8.3  | 0.16 <sup>b</sup> |
| Bleeding (any)           | 11        | 5.3  | 5          | 4.4  | 3               | 6.2  | 3          | 6.2  | 0.85 <sup>b</sup> |
| MDR pathogen             | 12        | 5.7  | 3          | 2.7  | 3               | 6.2  | 8          | 16.7 | 0.55 <sup>b</sup> |

Abbreviations: IQR, interquartile range; MDR, multidrug resistant

<sup>a</sup> Mann-Whitney U test

<sup>b</sup> Fisher's exact test

<sup>c</sup> Others include malignant neoplasms of lip, oral cavity and pharynx, thyroid and other endocrine glands, eye, brain and other parts of central nervous system, skin, mesothelial and soft tissue, male, female genital organs, urinary tract, ill-defined, other secondary and unspecified sites.

**Supplementary Table S2. Factors associated with unintended hospital visits within 2 months after discharge**

| Variables                                                 | With unintended<br>hospital visits within<br>2 months<br>(N=37) |      | Without unintended<br>hospital visits<br>within 2 months<br>(N=76) |      | <i>P</i> value    |
|-----------------------------------------------------------|-----------------------------------------------------------------|------|--------------------------------------------------------------------|------|-------------------|
|                                                           | N                                                               | %    | N                                                                  | %    |                   |
|                                                           |                                                                 |      |                                                                    |      |                   |
| Age                                                       |                                                                 |      |                                                                    |      |                   |
| median (IQR)                                              | 63.5 (53-74.2)                                                  |      | 64 (54-72)                                                         |      | 0.19 <sup>a</sup> |
| <45                                                       | 5                                                               | 13.5 | 8                                                                  | 10.5 | 0.69              |
| ≥45, <65                                                  | 14                                                              | 37.8 | 35                                                                 | 46.1 |                   |
| ≥65                                                       | 18                                                              | 48.6 | 33                                                                 | 43.4 |                   |
| Gender                                                    |                                                                 |      |                                                                    |      |                   |
| Male                                                      | 19                                                              | 51.4 | 39                                                                 | 51.3 | 1                 |
| Female                                                    | 18                                                              | 48.6 | 37                                                                 | 48.7 |                   |
| Type of cancer <sup>b</sup>                               |                                                                 |      |                                                                    |      |                   |
| Lung                                                      | 5                                                               | 13.5 | 18                                                                 | 23.7 | 0.69 <sup>c</sup> |
| Breast                                                    | 3                                                               | 8.1  | 4                                                                  | 5.3  |                   |
| Gastrointestinal                                          | 7                                                               | 18.9 | 13                                                                 | 17.1 |                   |
| Hepatobiliary-pancreas                                    | 9                                                               | 24.3 | 15                                                                 | 19.7 |                   |
| Hematologic malignancy                                    | 5                                                               | 13.5 | 6                                                                  | 7.9  |                   |
| Other                                                     | 8                                                               | 21.6 | 20                                                                 | 26.3 |                   |
| Treatment status                                          |                                                                 |      |                                                                    |      |                   |
| On chemotherapy                                           | 25                                                              | 67.6 | 30                                                                 | 39.5 | 0.01              |
| Off chemotherapy                                          | 12                                                              | 32.4 | 46                                                                 | 60.5 |                   |
| Route of admission                                        |                                                                 |      |                                                                    |      |                   |
| via outpatient clinic                                     | 16                                                              | 43.2 | 36                                                                 | 47.4 | 0.83              |
| via emergency department                                  | 21                                                              | 56.8 | 40                                                                 | 52.6 |                   |
| Major medical problem at the time of discharge            |                                                                 |      |                                                                    |      |                   |
| Confusion                                                 | 0                                                               | 0    | 1                                                                  | 1.3  | 1 <sup>c</sup>    |
| Pain                                                      | 25                                                              | 67.6 | 54                                                                 | 72.0 | 0.79              |
| Opioid use                                                | 24                                                              | 64.8 | 52                                                                 | 68.4 | 0.87              |
| Dose of opioid (morphine equivalent dose,<br>median(IQR)) | 20 (0-91.7)                                                     |      | 34.6 (0-90.2)                                                      |      | 0.79 <sup>b</sup> |
| Fever                                                     | 4                                                               | 5.6  | 1                                                                  | 2.8  | 0.87 <sup>c</sup> |
| Dyspnea                                                   | 15                                                              | 19.7 | 3                                                                  | 8.1  | 0.19              |
| Nausea/vomiting                                           | 4                                                               | 5.3  | 2                                                                  | 5.4  | 1 <sup>c</sup>    |
| Poor oral intake                                          | 20                                                              | 26.3 | 16                                                                 | 43.2 | 0.11              |
| Requirement of parenteral nutrition(any)                  | 10                                                              | 27.0 | 11                                                                 | 15   | 0.22 <sup>c</sup> |
| Requirement of parenteral nutrition(only)                 | 3                                                               | 8.1  | 4                                                                  | 5.3  | 0.68 <sup>c</sup> |
| Urologic symptoms                                         | 3                                                               | 8.1  | 3                                                                  | 3.9  | 0.63 <sup>c</sup> |
| Bleeding (any)                                            | 0                                                               | 0.0  | 1                                                                  | 1.3  | 1 <sup>c</sup>    |
| MDR pathogen                                              | 1                                                               | 2.7  | 2                                                                  | 2.6  | 1 <sup>c</sup>    |

Abbreviations: IQR, interquartile range; MDR, multidrug resistant

<sup>a</sup> Mann-Whitney U test

<sup>b</sup> Others include malignant neoplasms of lip, oral cavity and pharynx, thyroid and other endocrine glands, eye, brain and other parts of central nervous system, skin, mesothelial and soft tissue, male, female genital organs, urinary tract, ill-defined, other secondary and unspecified sites.

<sup>c</sup> Fisher's exact test
